# Supplementary material for: An effective lithium incorporation strategy to boost the charge-storage capacity of bimetallic metal–organic frameworks with theoretical insights and solid-state lithium-ion capacitors
Source: Royal Society of Chemistry journal article supplement (doi:10.1039/d4ta01726a), 2024-01-01
Supplement: d4ta01726a1.pdf [file d4ta01726a1.pdf]

## Supporting information

# An effective lithium incorporation strategy to boost the charge-storage capacity of bimetallic metal-organic frameworks with theoretical insights and solid-state lithium-ion capacitors

Gopinath Sahoo <sup>a, c, †</sup>, Thillai Govindaraja Senthamarai Kannan <sup>b, †</sup>, Hyeon Seo Jeong <sup>a</sup>, Parthasarathi Bandyopadhyay <sup>a</sup>, Dong-Hee Lim <sup>b</sup>, Saroj Kumar Nayak <sup>c</sup>, and Sang Mun Jeong <sup>a, \*</sup>

<sup>a</sup> Department of Chemical Engineering, Chungbuk National University, Cheongju, Chungbuk 28644, Republic of Korea

<sup>b</sup> Department of Environmental Engineering, Chungbuk National University, Chungbuk 28644, Republic of Korea

<sup>c</sup> School of Basic Sciences, Indian Institute of Technology Bhubaneswar, Argul, Khordha 752050, India

<sup>†</sup> Authors contributed equally

\*Corresponding author

E-mail: [smjeong@chungbuk.ac.kr](mailto:smjeong@chungbuk.ac.kr) (S. M. Jeong)

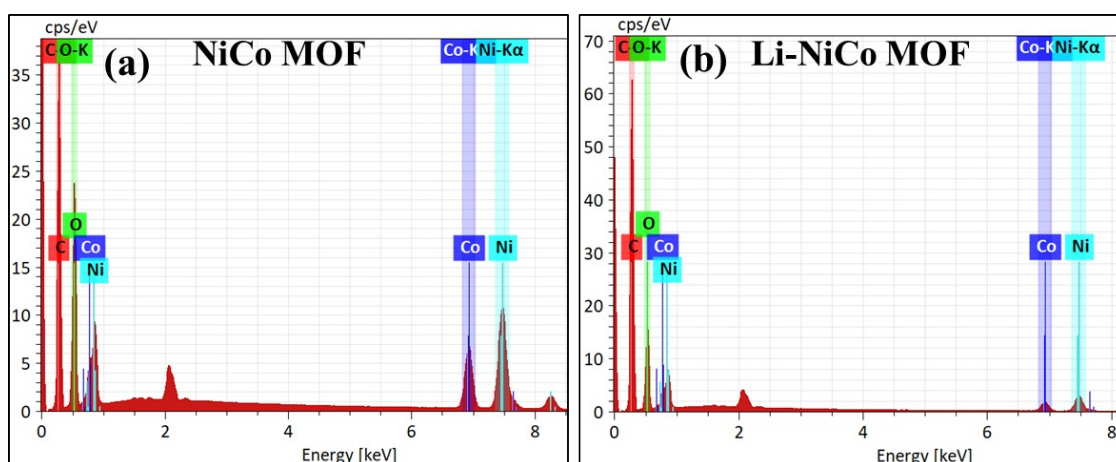

Fig. S1. Depict the EDS elemental composition of (a) NiCo MOF and (b) Li-NiCo MOF.

| NiCo MOF |         |                |               | Li-NiCo MOF |         |                |               |
|----------|---------|----------------|---------------|-------------|---------|----------------|---------------|
| Element  | At. No. | Mass Norm. [%] | Atom [%]      | Element     | At. No. | Mass Norm. [%] | Atom [%]      |
| C        | 6       | 43.96          | 61.99         | C           | 6       | 60.22          | 70.62         |
| O        | 8       | 28.38          | 30.04         | O           | 8       | 30.98          | 27.27         |
| Co       | 27      | 9.48           | 2.72          | Co          | 27      | 2.87           | 0.69          |
| Ni       | 28      | 18.17          | 5.24          | Ni          | 28      | 5.93           | 1.42          |
|          |         | <b>100.00</b>  | <b>100.00</b> |             |         | <b>100.00</b>  | <b>100.00</b> |

Fig. S2. Concentration percentage of the elements in NiCo MOF and Li-NiCo MOF.

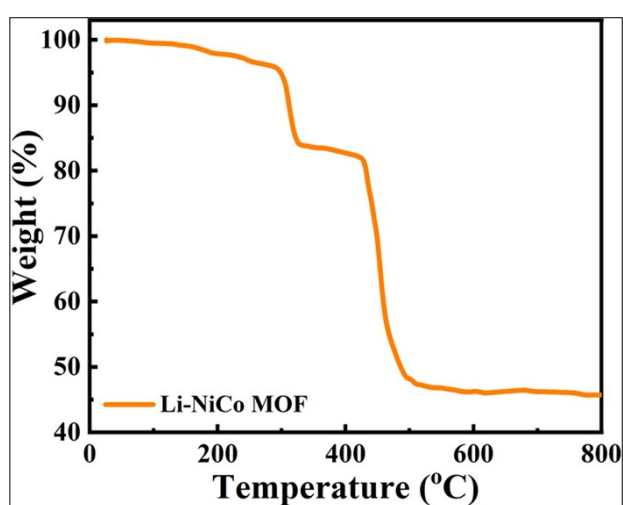

Fig. S3. TGA curve of Li-NiCo MOF.

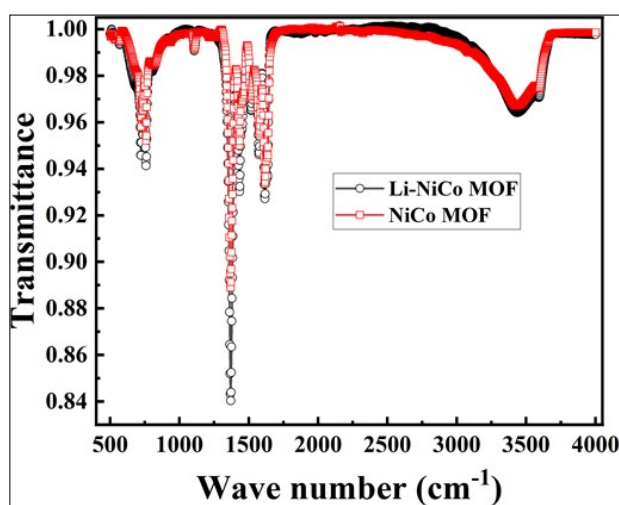

Fig. S4. Normalized FTIR plot for NiCo MOF and Li-NiCo MOF.

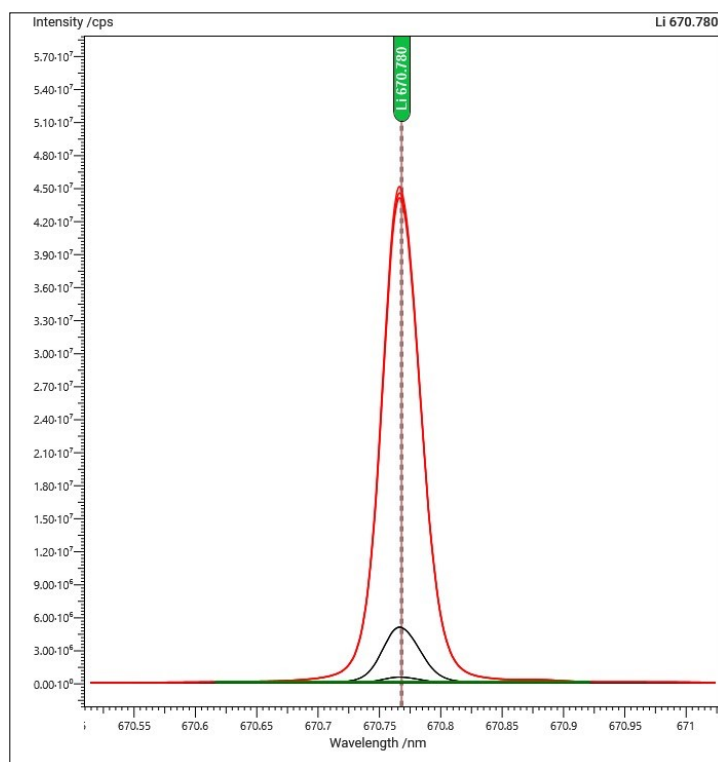

Fig. S5. ICP-OES data depicts the Li peak in Li-NiCo MOF

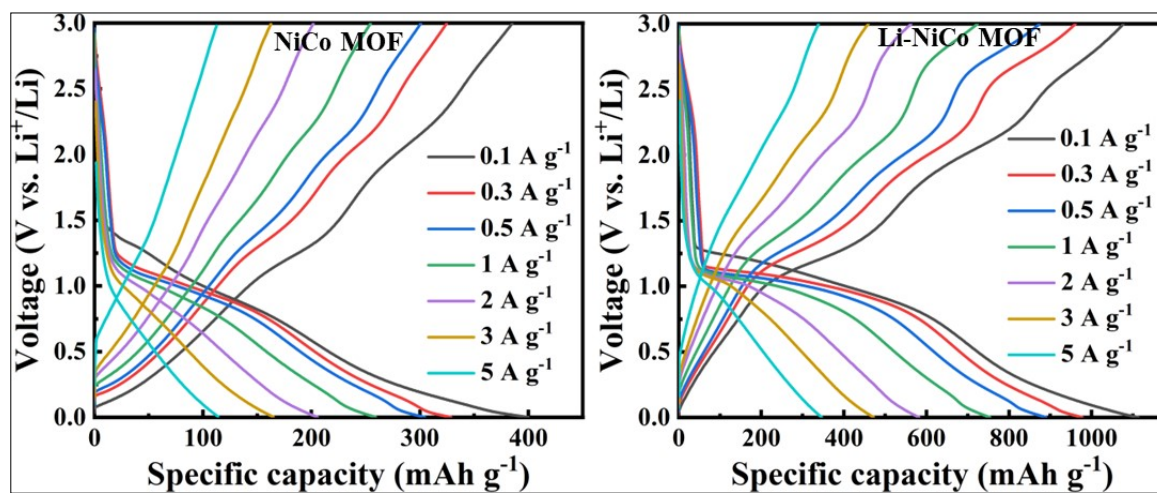

Fig. S6. CV profile for NiCo MOF and Li-NiCo MOF at different current density 0.1 to 5 A  $g^{-1}$ .

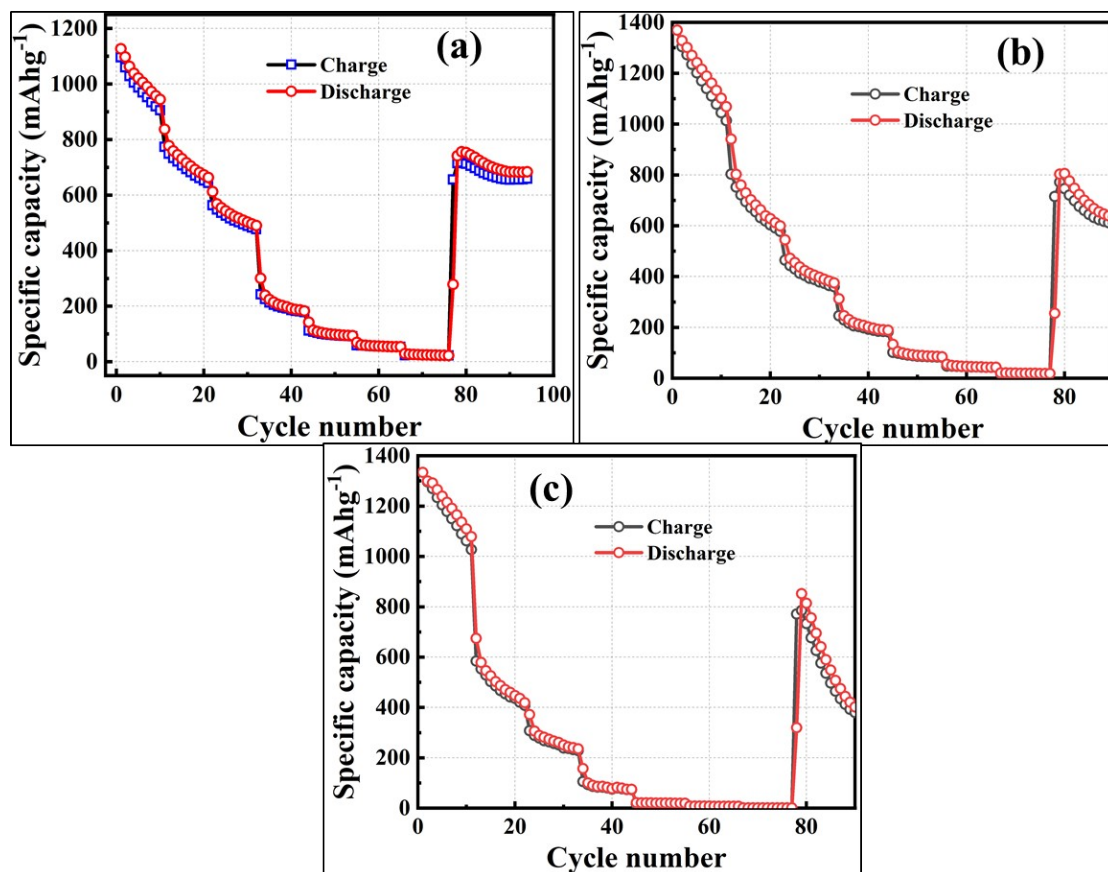

Fig. S7. Rate capability behavior for high Li-incorporated NiCo MOF prepared using (a) 2, (b) 3, and (c) 4 mmol of LiNO<sub>3</sub>.

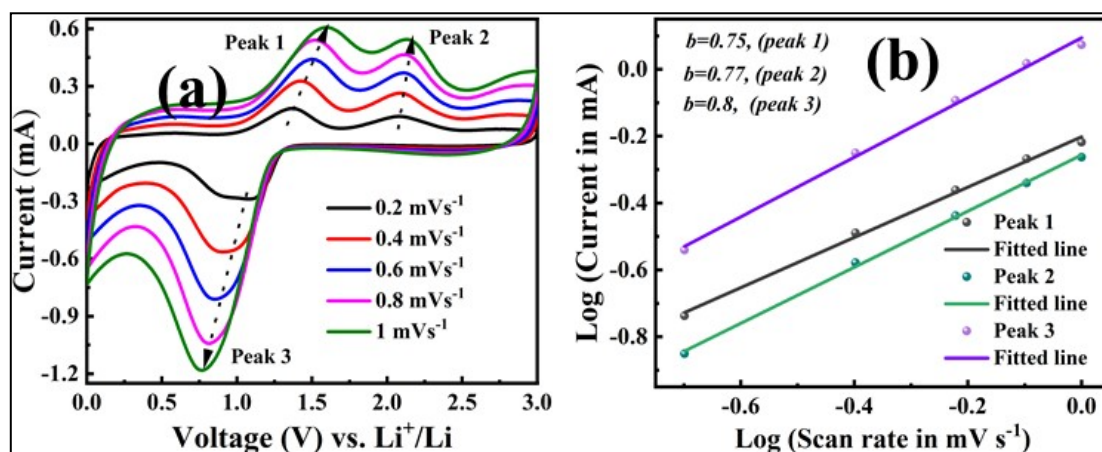

Fig. S8. (a) CV curves at different scan rates, and (b) b-value calculation by plotting log (scan rate) vs. log (current), for NiCo MOF.

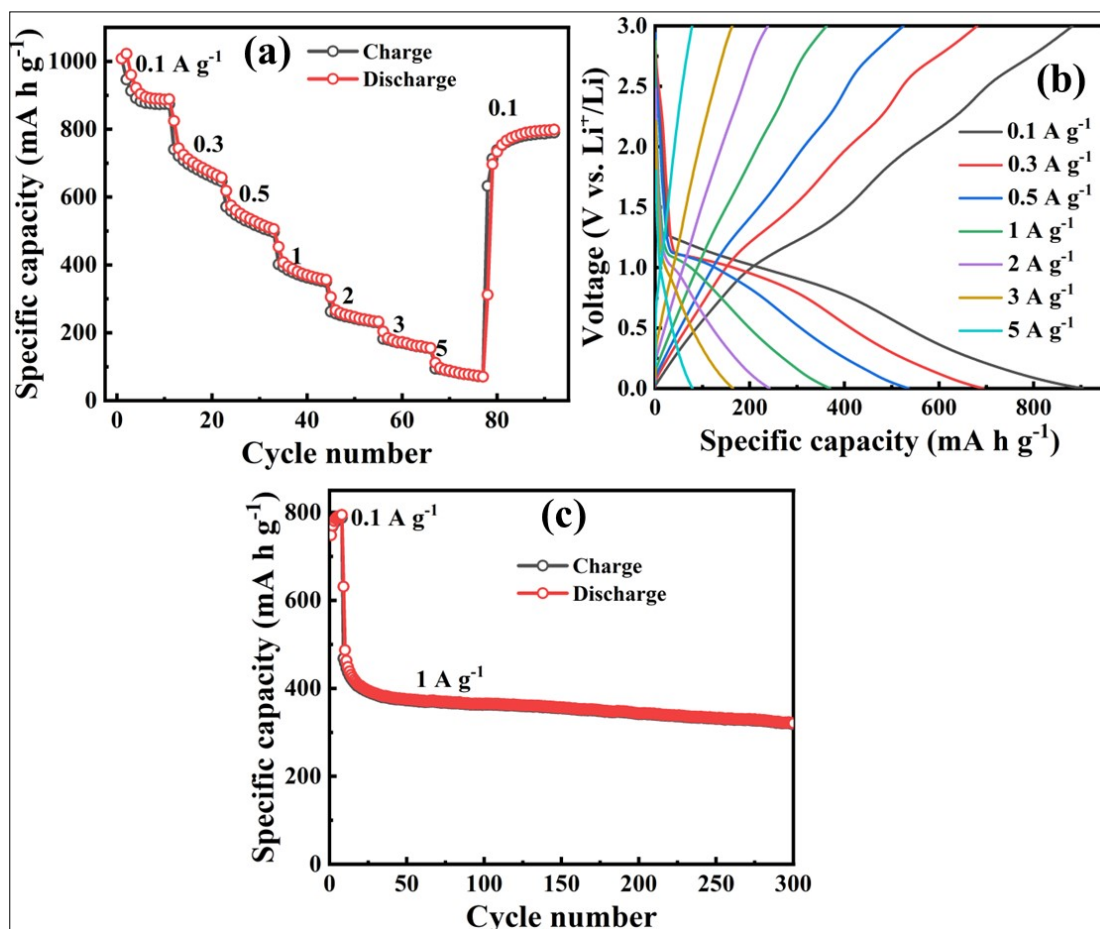

Fig. S9. (a) rate capability, (b) CD profile at different current densities, and (f) cycling capacity for 300 cycles Li-NiCo MOF prepared by sonochemical method.



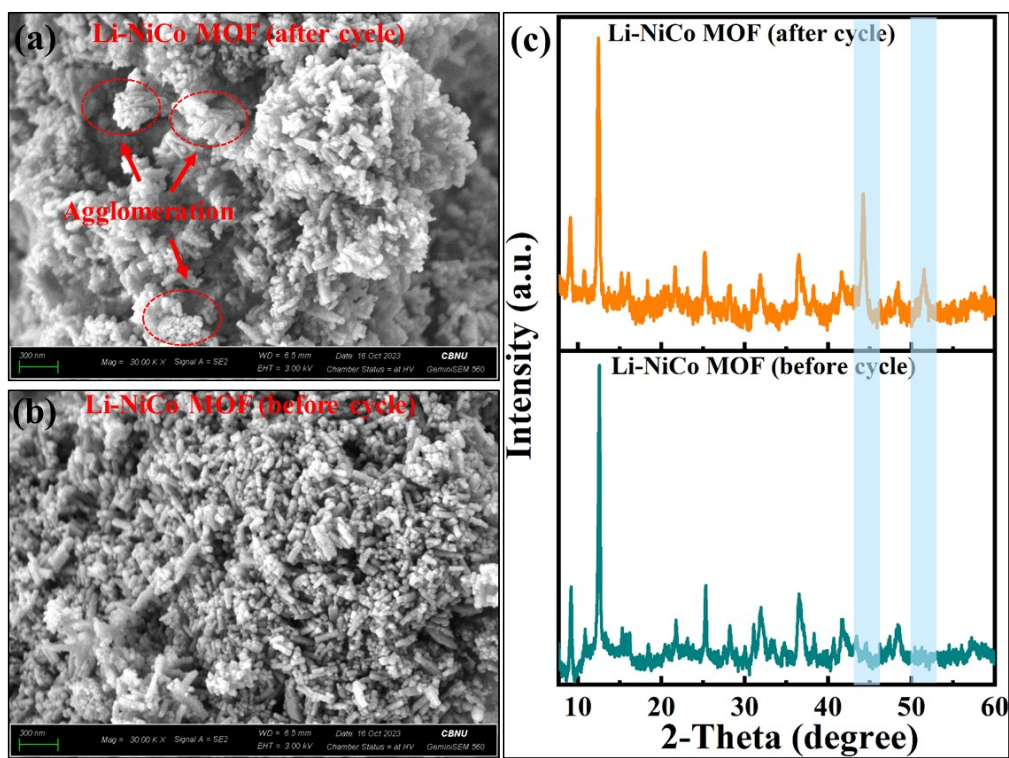

Fig. S10. SEM image of Li-NiCo MOF (a) after and (b) before the cycle test, and (c) XRD spectra for Li-NiCo MOF, before and after the cycle test.

## CONTCAR file of NiCo MOF

C Co H O Ni

1.0000000000000000

0.0000000000000000 13.1517099999999996 13.1517099999999996

13.1517099999999996 0.0000000000000000 13.1517099999999996

13.1517099999999996 13.1517099999999996 0.0000000000000000

C Co H O Ni

72 6 24 48 6

Selective dynamics

Direct

|                    |                    |                    |   |   |   |
|--------------------|--------------------|--------------------|---|---|---|
| 0.4316499186278548 | 0.4295942172718696 | 0.9753835219370188 | T | T | T |
| 0.4324151196558219 | 0.4287317656837715 | 0.1635467655191363 | T | T | T |
| 0.9754148530896884 | 0.1636450533014013 | 0.4316654976141692 | T | T | T |
| 0.1635165872931239 | 0.9755642319507700 | 0.4307468177970222 | T | T | T |
| 0.9753835219370188 | 0.4316499186278548 | 0.4295942172718696 | T | T | T |
| 0.1635467655191363 | 0.4324151196558219 | 0.4287317656837715 | T | T | T |
| 0.4316654976141692 | 0.9754148530896884 | 0.1636450533014013 | T | T | T |
| 0.4307468177970222 | 0.1635165872931239 | 0.9755642319507700 | T | T | T |
| 0.4295942172718696 | 0.9753835219370188 | 0.4316499186278548 | T | T | T |
| 0.4287317656837715 | 0.1635467655191363 | 0.4324151196558219 | T | T | T |
| 0.1636450533014013 | 0.4316654976141692 | 0.9754148530896884 | T | T | T |
| 0.9755642319507700 | 0.4307468177970222 | 0.1635165872931239 | T | T | T |
| 0.5713456603482356 | 0.5676948979330803 | 0.8365237158806309 | T | T | T |
| 0.5705872701600612 | 0.5685291304503650 | 0.0245869625947392 | T | T | T |
| 0.0245343947747827 | 0.8366686640692791 | 0.5705757929143260 | T | T | T |
| 0.8364239116770733 | 0.0247912797399152 | 0.5697639812013264 | T | T | T |
| 0.0247912797399152 | 0.5697639812013264 | 0.8364239116770733 | T | T | T |
| 0.8366686640692791 | 0.5705757929143260 | 0.0245343947747827 | T | T | T |
| 0.5685291304503650 | 0.0245869625947392 | 0.5705872701600612 | T | T | T |
| 0.5676948979330803 | 0.8365237158806309 | 0.5713456603482356 | T | T | T |
| 0.5705757929143260 | 0.0245343947747827 | 0.8366686640692791 | T | T | T |
| 0.5697639812013264 | 0.8364239116770733 | 0.0247912797399152 | T | T | T |
| 0.8365237158806309 | 0.5713456603482356 | 0.5676948979330803 | T | T | T |
| 0.0245869625947392 | 0.5705872701600612 | 0.5685291304503650 | T | T | T |
| 0.3869567229759170 | 0.3864374656195650 | 0.9696546943368602 | T | T | T |
| 0.3872949155651639 | 0.3858937482456994 | 0.2570619148306932 | T | T | T |
| 0.9697124023646850 | 0.2571817382923953 | 0.3868887272224200 | T | T | T |
| 0.2571026174730591 | 0.9697565408516553 | 0.3864222216841640 | T | T | T |
| 0.9696546943368602 | 0.3869567229759170 | 0.3864374656195650 | T | T | T |
| 0.2570619148306932 | 0.3872949155651639 | 0.3858937482456994 | T | T | T |
| 0.3868887272224200 | 0.9697124023646850 | 0.2571817382923953 | T | T | T |
| 0.3864222216841640 | 0.2571026174730591 | 0.9697565408516553 | T | T | T |
| 0.3864374656195650 | 0.9696546943368602 | 0.3869567229759170 | T | T | T |
| 0.3858937482456994 | 0.2570619148306932 | 0.3872949155651639 | T | T | T |
| 0.2571817382923953 | 0.3868887272224200 | 0.9697124023646850 | T | T | T |
| 0.9697565408516553 | 0.3864222216841640 | 0.2571026174730591 | T | T | T |
| 0.6140899075631481 | 0.6127034885861491 | 0.7429269502151143 | T | T | T |
| 0.6137929614604829 | 0.6131994045957043 | 0.0302390062776325 | T | T | T |

|                    |                    |                    |   |   |   |
|--------------------|--------------------|--------------------|---|---|---|
| 0.0302488625638375 | 0.7431053346444898 | 0.6136357243491162 | T | T | T |
| 0.7429093175311579 | 0.0303399542265126 | 0.6132918955470714 | T | T | T |
| 0.0303399542265126 | 0.6132918955470714 | 0.7429093175311579 | T | T | T |
| 0.7431053346444898 | 0.6136357243491162 | 0.0302488625638375 | T | T | T |
| 0.6131994045957043 | 0.0302390062776325 | 0.6137929614604829 | T | T | T |
| 0.6127034885861491 | 0.7429269502151143 | 0.6140899075631481 | T | T | T |
| 0.6136357243491162 | 0.0302488625638375 | 0.7431053346444898 | T | T | T |
| 0.6132918955470714 | 0.7429093175311579 | 0.0303399542265126 | T | T | T |
| 0.7429269502151143 | 0.6140899075631481 | 0.6127034885861491 | T | T | T |
| 0.0302390062776325 | 0.6137929614604829 | 0.6131994045957043 | T | T | T |
| 0.3004809746105295 | 0.4302257447680020 | 0.9696554151859260 | T | T | T |
| 0.4301414895529518 | 0.2992949359914476 | 0.3008155363497238 | T | T | T |
| 0.9697641688064849 | 0.2998656805067199 | 0.3003329675014612 | T | T | T |
| 0.2999128890658866 | 0.9696576993761212 | 0.4302232713366578 | T | T | T |
| 0.9696554151859260 | 0.3004809746105295 | 0.4302257447680020 | T | T | T |
| 0.3008155363497238 | 0.4301414895529518 | 0.2992949359914476 | T | T | T |
| 0.3003329675014612 | 0.9697641688064849 | 0.2998656805067199 | T | T | T |
| 0.4302232713366578 | 0.2999128890658866 | 0.9696576993761212 | T | T | T |
| 0.4302257447680020 | 0.9696554151859260 | 0.3004809746105295 | T | T | T |
| 0.2992949359914476 | 0.3008155363497238 | 0.4301414895529518 | T | T | T |
| 0.2998656805067199 | 0.3003329675014612 | 0.9697641688064849 | T | T | T |
| 0.9696576993761212 | 0.4302232713366578 | 0.2999128890658866 | T | T | T |
| 0.7006787930112779 | 0.5698404791113489 | 0.6991750635176359 | T | T | T |
| 0.5699640957965144 | 0.6997379182288483 | 0.0302810893836423 | T | T | T |
| 0.0302437814059076 | 0.7003933689869442 | 0.5698722567134951 | T | T | T |
| 0.7001498635529160 | 0.0303240235034821 | 0.6998241828177356 | T | T | T |
| 0.0303240235034821 | 0.6998241828177356 | 0.7001498635529160 | T | T | T |
| 0.7003933689869442 | 0.5698722567134951 | 0.0302437814059076 | T | T | T |
| 0.6997379182288483 | 0.0302810893836423 | 0.5699640957965144 | T | T | T |
| 0.5698404791113489 | 0.6991750635176359 | 0.7006787930112779 | T | T | T |
| 0.5698722567134951 | 0.0302437814059076 | 0.7003933689869442 | T | T | T |
| 0.6998241828177356 | 0.7001498635529160 | 0.0303240235034821 | T | T | T |
| 0.6991750635176359 | 0.7006787930112779 | 0.5698404791113489 | T | T | T |
| 0.0302810893836423 | 0.5699640957965144 | 0.6997379182288483 | T | T | T |
| 0.4234193557000552 | 0.5766520285301837 | 0.0000478935383299 | T | T | T |
| 0.9999425040995362 | 0.0001128167548146 | 0.4228459399387035 | T | T | T |
| 0.0000478935383299 | 0.4234193557000552 | 0.5766520285301837 | T | T | T |
| 0.4228459399387035 | 0.9999425040995362 | 0.0001128167548146 | T | T | T |
| 0.5766520285301837 | 0.0000478935383299 | 0.4234193557000552 | T | T | T |
| 0.0001128167548146 | 0.4228459399387035 | 0.9999425040995362 | T | T | T |
| 0.2660989204535085 | 0.4970952559566513 | 0.9714844559696445 | T | T | T |
| 0.4970011052029832 | 0.2645938545404221 | 0.2668091201197029 | T | T | T |
| 0.9716356614488291 | 0.2653181604051937 | 0.2661697686059128 | T | T | T |
| 0.2653426384574331 | 0.9714964581751744 | 0.4970980281184580 | T | T | T |
| 0.9714844559696445 | 0.2660989204535085 | 0.4970952559566513 | T | T | T |
| 0.2668091201197029 | 0.4970011052029832 | 0.2645938545404221 | T | T | T |
| 0.2661697686059128 | 0.9716356614488291 | 0.2653181604051937 | T | T | T |
| 0.4970980281184580 | 0.2653426384574331 | 0.9714964581751744 | T | T | T |
| 0.4970952559566513 | 0.9714844559696445 | 0.2660989204535085 | T | T | T |



|                    |                    |                    |   |   |   |
|--------------------|--------------------|--------------------|---|---|---|
| 0.2645938545404221 | 0.2668091201197029 | 0.4970011052029832 | T | T | T |
| 0.2653181604051937 | 0.2661697686059128 | 0.9716356614488291 | T | T | T |
| 0.9714964581751744 | 0.4970980281184580 | 0.2653426384574331 | T | T | T |
| 0.7353701117219416 | 0.5029764248632063 | 0.7331825716090350 | T | T | T |
| 0.5031095152318343 | 0.7338844534238049 | 0.0284516422245531 | T | T | T |
| 0.0283877821181662 | 0.7347013301970833 | 0.5030127014729118 | T | T | T |
| 0.7347016623431770 | 0.0284708258986299 | 0.7339953497290068 | T | T | T |
| 0.0284708258986299 | 0.7339953497290068 | 0.7347016623431770 | T | T | T |
| 0.7347013301970833 | 0.5030127014729118 | 0.0283877821181662 | T | T | T |
| 0.7338844534238049 | 0.0284516422245531 | 0.5031095152318343 | T | T | T |
| 0.5029764248632063 | 0.7331825716090350 | 0.7353701117219416 | T | T | T |
| 0.5030127014729118 | 0.0283877821181662 | 0.7347013301970833 | T | T | T |
| 0.7339953497290068 | 0.7347016623431770 | 0.0284708258986299 | T | T | T |
| 0.7331825716090350 | 0.7353701117219416 | 0.5029764248632063 | T | T | T |
| 0.0284516422245531 | 0.5031095152318343 | 0.7338844534238049 | T | T | T |
| 0.5094499801700749 | 0.3852328778069420 | 0.9786289450942363 | T | T | T |
| 0.3890352022592793 | 0.5071252540044355 | 0.1254415998676848 | T | T | T |
| 0.9787256262008910 | 0.1269759257915766 | 0.5094123578998193 | T | T | T |
| 0.1256618479992326 | 0.9791457318723218 | 0.3867798110434748 | T | T | T |
| 0.9786289450942363 | 0.5094499801700749 | 0.3852328778069420 | T | T | T |
| 0.1254415998676848 | 0.3890352022592793 | 0.5071252540044355 | T | T | T |
| 0.5094123578998193 | 0.9787256262008910 | 0.1269759257915766 | T | T | T |
| 0.3867798110434748 | 0.1256618479992326 | 0.9791457318723218 | T | T | T |
| 0.3852328778069420 | 0.9786289450942363 | 0.5094499801700749 | T | T | T |
| 0.5071252540044355 | 0.1254415998676848 | 0.3890352022592793 | T | T | T |
| 0.1269759257915766 | 0.5094123578998193 | 0.9787256262008910 | T | T | T |
| 0.9791457318723218 | 0.3867798110434748 | 0.1256618479992326 | T | T | T |
| 0.4930828046019258 | 0.6112069674465701 | 0.8747045611178805 | T | T | T |
| 0.6148945131103076 | 0.4906797975455675 | 0.0214318578664603 | T | T | T |
| 0.0211948250137510 | 0.8733409950023585 | 0.6149674199933628 | T | T | T |
| 0.8742014346664533 | 0.0215614161197877 | 0.4913891352147459 | T | T | T |
| 0.0215614161197877 | 0.4913891352147459 | 0.8742014346664533 | T | T | T |
| 0.8733409950023585 | 0.6149674199933628 | 0.0211948250137510 | T | T | T |
| 0.4906797975455675 | 0.0214318578664603 | 0.6148945131103076 | T | T | T |
| 0.6112069674465701 | 0.8747045611178805 | 0.4930828046019258 | T | T | T |
| 0.6149674199933628 | 0.0211948250137510 | 0.8733409950023585 | T | T | T |
| 0.4913891352147459 | 0.8742014346664533 | 0.0215614161197877 | T | T | T |
| 0.8747045611178805 | 0.4930828046019258 | 0.6112069674465701 | T | T | T |
| 0.0214318578664603 | 0.6148945131103076 | 0.4906797975455675 | T | T | T |
| 0.4922994996831775 | 0.6122595792188221 | 0.0212087196203825 | T | T | T |
| 0.6158699894500899 | 0.4899372778117623 | 0.8731078229548430 | T | T | T |
| 0.0212919997427576 | 0.8746992042013559 | 0.4922064875911616 | T | T | T |
| 0.8732124740784499 | 0.0216150876043741 | 0.6139527741111266 | T | T | T |
| 0.0212087196203825 | 0.4922994996831775 | 0.6122595792188221 | T | T | T |
| 0.8731078229548430 | 0.6158699894500899 | 0.4899372778117623 | T | T | T |
| 0.4922064875911616 | 0.0212919997427576 | 0.8746992042013559 | T | T | T |
| 0.6139527741111266 | 0.8732124740784499 | 0.0216150876043741 | T | T | T |
| 0.6122595792188221 | 0.0212087196203825 | 0.4922994996831775 | T | T | T |
| 0.4899372778117623 | 0.8731078229548430 | 0.6158699894500899 | T | T | T |

|                    |                    |                    |   |   |   |
|--------------------|--------------------|--------------------|---|---|---|
| 0.8746992042013559 | 0.4922064875911616 | 0.0212919997427576 | T | T | T |
| 0.0216150876043741 | 0.6139527741111266 | 0.8732124740784499 | T | T | T |
| 0.5101865961781868 | 0.3842211018466344 | 0.1269740605378828 | T | T | T |
| 0.3879441899515044 | 0.5078687762457221 | 0.9787628090942917 | T | T | T |
| 0.9787116258634256 | 0.1255991943730450 | 0.3880579023897184 | T | T | T |
| 0.1267250135557560 | 0.9787068370549576 | 0.5085642257283354 | T | T | T |
| 0.9787068370549576 | 0.5085642257283354 | 0.1267250135557560 | T | T | T |
| 0.1255991943730450 | 0.3880579023897184 | 0.9787116258634256 | T | T | T |
| 0.5078687762457221 | 0.9787628090942917 | 0.3879441899515044 | T | T | T |
| 0.3842211018466344 | 0.1269740605378828 | 0.5101865961781868 | T | T | T |
| 0.3880579023897184 | 0.9787116258634256 | 0.1255991943730450 | T | T | T |
| 0.5085642257283354 | 0.1267250135557560 | 0.9787068370549576 | T | T | T |
| 0.1269740605378828 | 0.5101865961781868 | 0.3842211018466344 | T | T | T |
| 0.9787628090942917 | 0.3879441899515044 | 0.5078687762457221 | T | T | T |
| 0.5631753918071851 | 0.4369132584070812 | 0.0000295547451117 | T | T | T |
| 0.9999644078343053 | 0.0001331542819045 | 0.5625495418888491 | T | T | T |
| 0.0000295547451117 | 0.5631753918071851 | 0.4369132584070812 | T | T | T |
| 0.5625495418888491 | 0.9999644078343053 | 0.0001331542819045 | T | T | T |
| 0.4369132584070812 | 0.0000295547451117 | 0.5631753918071851 | T | T | T |
| 0.0001331542819045 | 0.5625495418888491 | 0.9999644078343053 | T | T | T |
